# Supplementary material for: Ceria/polymer nanocontainers for high-performance encapsulation of fluorophores
Source: publisher site journal article supplement (doi:10.3762/bjnano.10.53), 2019-02-22
Supplement: Additional file 1 [file 2190-4286-10-53-S1.pdf]

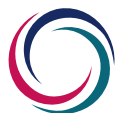

## Supporting Information

for

### **Ceria/polymer nanocontainers for high-performance encapsulation of fluorophores**

Kartheek Katta, Dmitry Busko, Yuri Avlasevich, Katharina Landfester, Stanislav Balushev and Rafael Muñoz-Espí

*Beilstein J. Nanotechnol.* **2019**, *10*, 522–530. [doi:10.3762/bjnano.10.53](https://doi.org/10.3762/bjnano.10.53)

### **Chemical structure of TDI, absorption and emission spectra of TDI, EDX spectra, TGA, and additional photoluminescence emission spectra of samples**

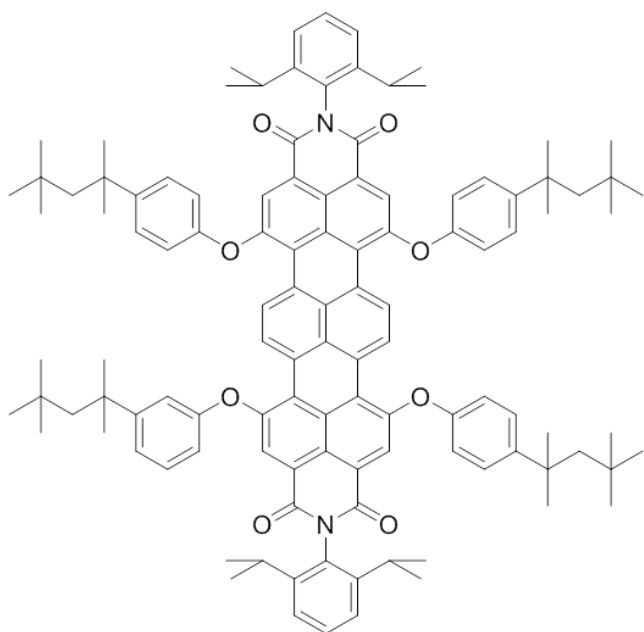

**Figure S1:** Chemical structure of *N,N'*-(2,6-diisopropylphenyl)-1,6,9,13-tetrakis[4-(1,1,3,3-tetramethylbutyl)phenoxy]terrylene-3,4,11,12-bis(dicarboximide) (TDI)

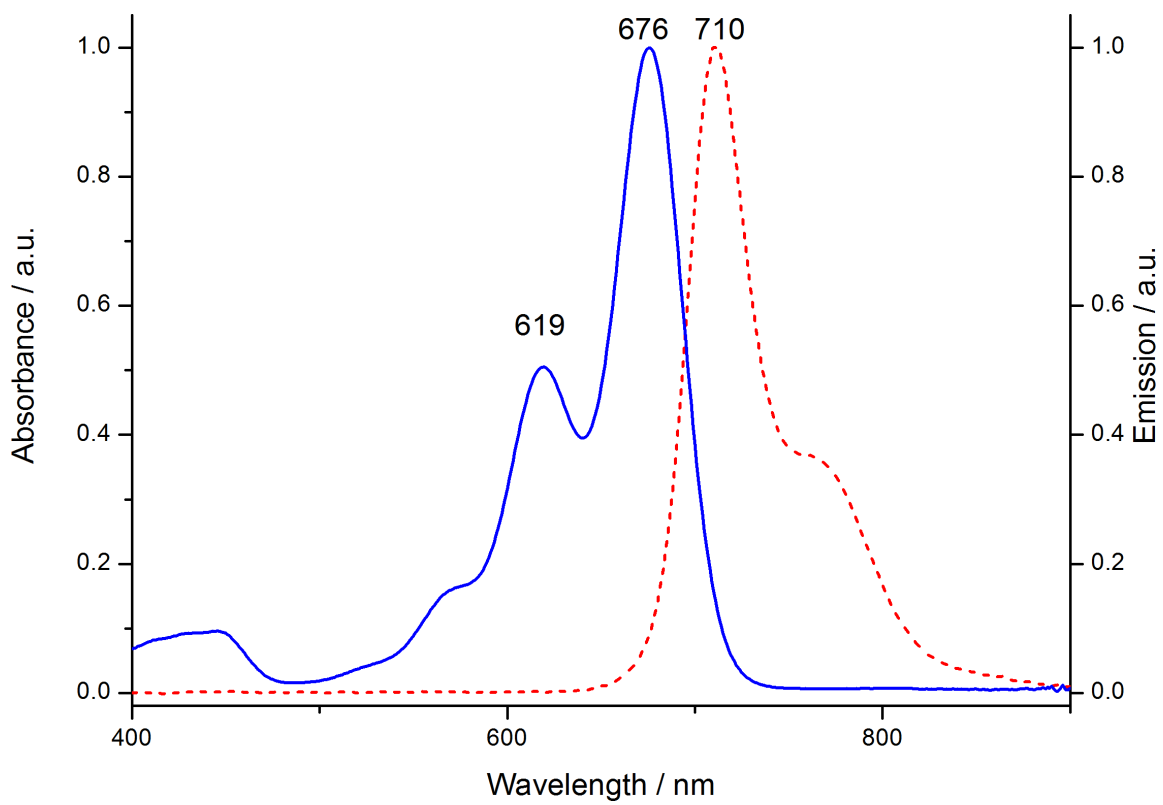

**Figure S2:** Absorption (blue curve) and fluorescence emission (red curve) spectra for TDI.

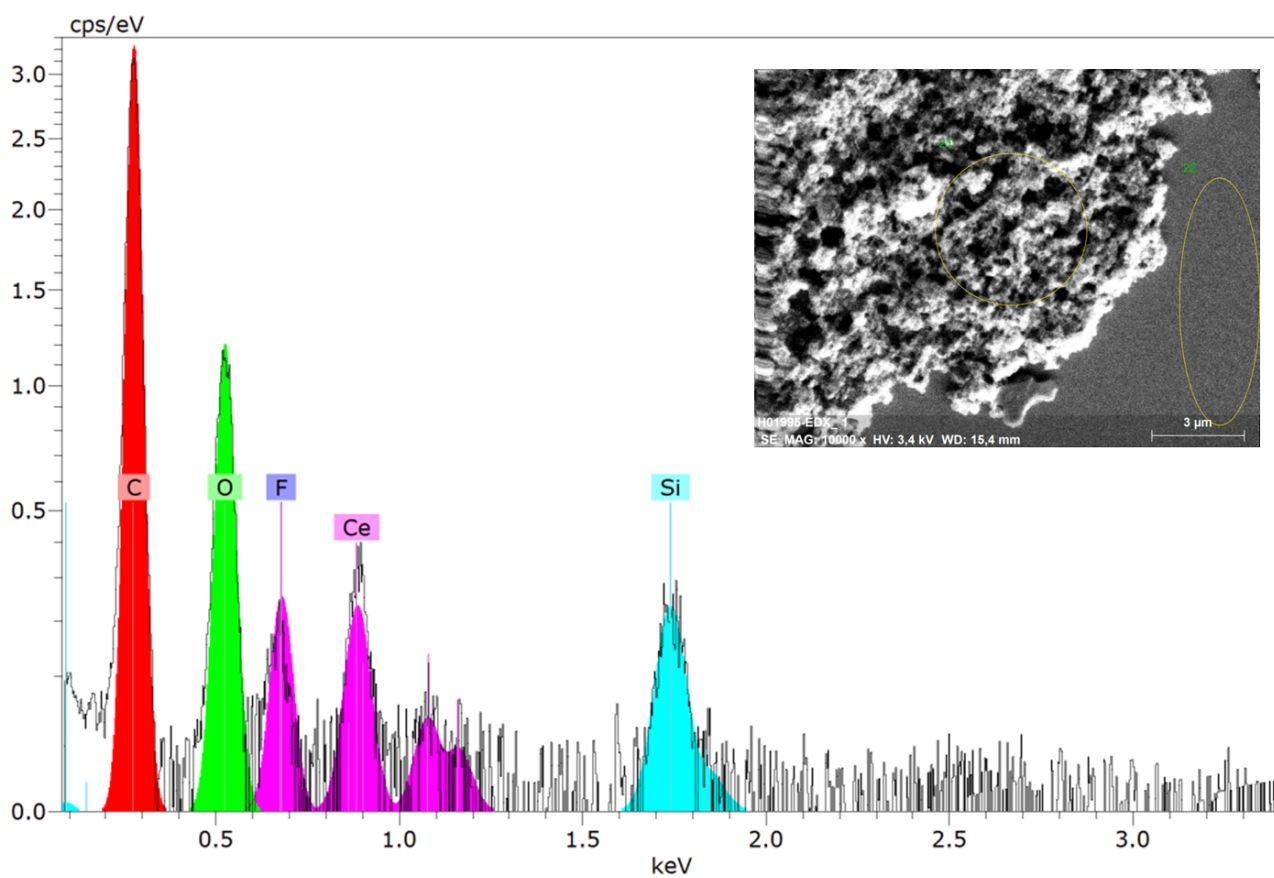

**Figure S3:** EDX spectrum and corresponding SEM image of hybrid polystyrene nanocapsules with  $\text{CeO}_2$  on the surface (sample NC- $\text{CeO}_2$ ).

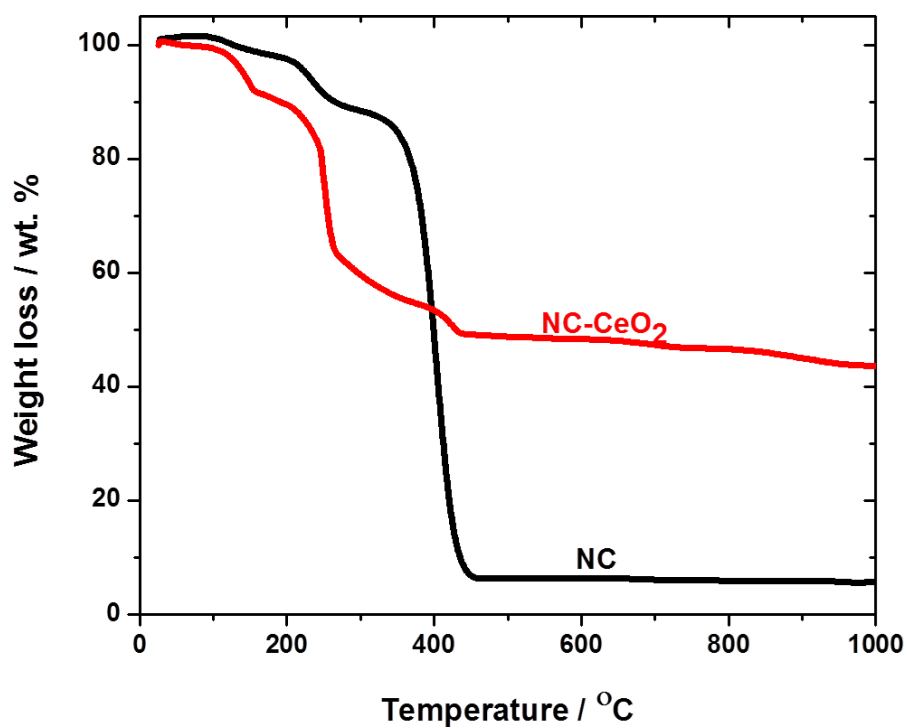

**Figure S4:** Thermogravimetric analysis curves of NC (black line, ambient conditions without cerium oxide) and NC-CeO<sub>2</sub> (red line, ambient conditions with cerium oxide).

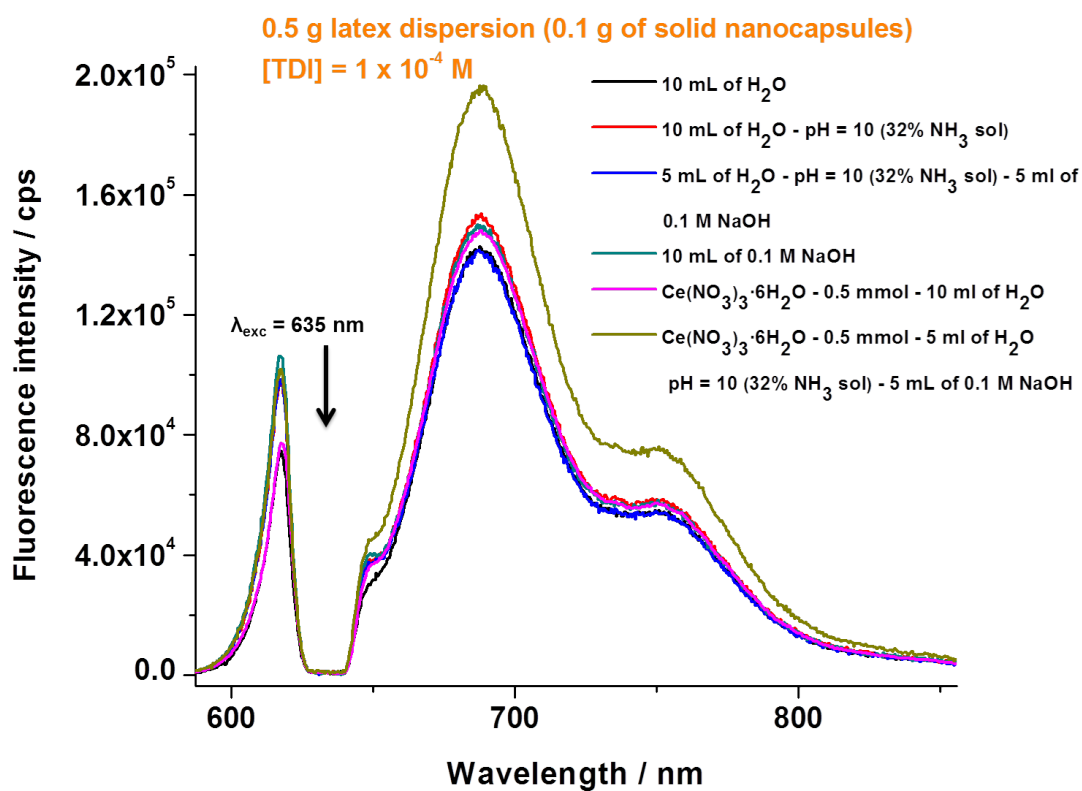

**Figure S5:** Luminescence spectra of terylene diimide encapsulated nanocapsules under various conditions. The excitation intensity of the laser (635 nm) was  $0.2 \text{ W cm}^{-2}$ .

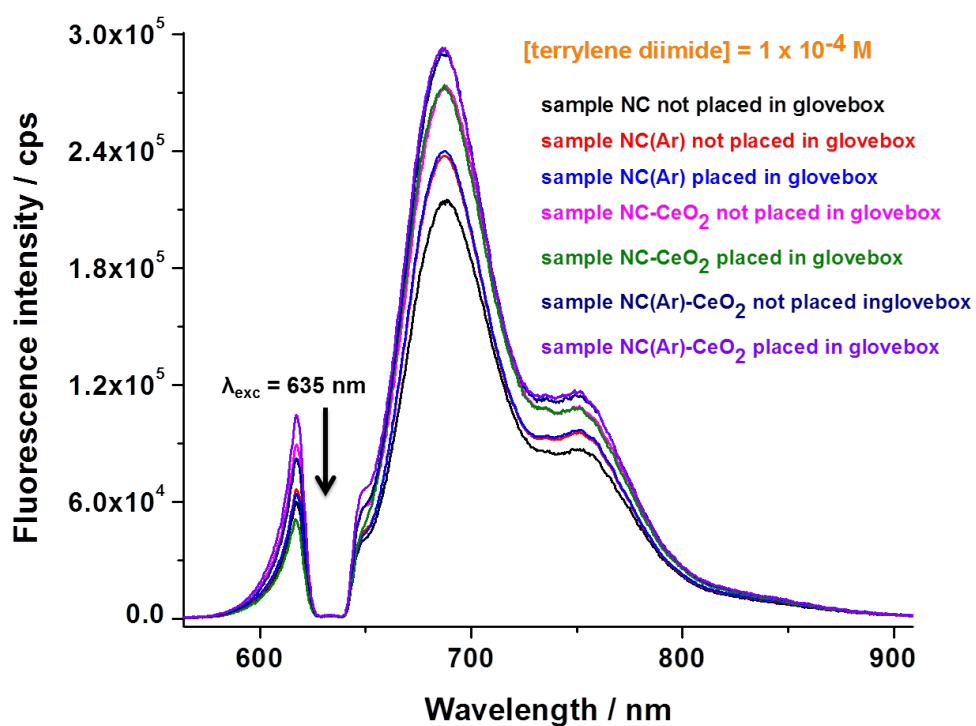

**Figure S6:** Luminescence emission spectra of samples encapsulating later terrylene diimide, placed and not placed in glovebox: **NC** (ambient conditions without CeO<sub>2</sub>), **NC(Ar)** (argon conditions without CeO<sub>2</sub>), **NC-CeO<sub>2</sub>** (ambient conditions with CeO<sub>2</sub>), and **NC(Ar)-CeO<sub>2</sub>** (argon conditions with CeO<sub>2</sub>). The excitation intensity of the laser (635 nm) was  $0.2 \text{ W cm}^{-2}$ .
